# Supplementary material for: Genetic Heterogeneity in Algerian Human Populations
Source: PLoS One. 2015 Sep 24;10(9):e0138453. doi: 10.1371/journal.pone.0138453 (PMC4581715; doi:10.1371/journal.pone.0138453)
Supplement: S7 Table — (XLSX) [file pone.0138453.s009.xlsx]

## Sheet: Supplementary Table 7
Supplementary table 7. Fst values based on autosomal SNPs
	Yoruba	Algeria	Zenata	Mozabite	Palestinia	French_Bas
Yoruba	0	0.091	0.037	0.088	0.122	0.155
Algeria	0.091	0	0.017	0.007	0.012	0.027
Zenata	0.037	0.017	0	0.018	0.038	0.062
Mozabite	0.088	0.007	0.018	0	0.021	0.037
Palestinia	0.122	0.012	0.038	0.021	0	0.021
French_Bas	0.155	0.027	0.062	0.037	0.021	0
