# Supplementary material for: Genetic Heterogeneity in Algerian Human Populations
Source: PLoS One. 2015 Sep 24;10(9):e0138453. doi: 10.1371/journal.pone.0138453 (PMC4581715; doi:10.1371/journal.pone.0138453)
Supplement: S8 Table — (XLSX) [file pone.0138453.s010.xlsx]

## Sheet: Supplementary Table 8
Supplementary table 8. Comparative table of mean percentages of ancestry
Autosomes
	Algeria	Zenata	French_Basque1	Mozabite 1	Palestinian1	Yoruba 1
Sub-saharan Africa	11.0634	45.0161	0	8.92353	1.24647	99.997
North Africa	46.4111	34.7954	0.00103	82.3019	5.20127	0
Europe	11.5191	2.73548	99.997	2.82629	5.75995	0
Middle East	31.0064	17.453	0	5.94829	87.7923	0
X Chromosome
	Algeria	Zenata	French_Basque1	Mozabite 1	Palestinian1	Yoruba 1
Sub-saharan Africa	15.2795	52.8336	0	14.3328	4.78188	98.3752
North Africa	28.8236	16.741	3.93242	52.3445	17.3681	1.13027
Europe	19.1618	12.463	74.2209	12.8738	18.9405	0.353935
Middle East	36.7351	17.9625	21.8457	20.4489	58.9096	0.140565
MT DNA
	Algiers	Oran	Zenata	Reguibate	Mozabite	Oran1
Sub-saharan Africa	37.0968	21.5054	65.7534	25.9259	12.9412	20
North Africa	15.4672	30.3995	8.4093	23.4717	47.4096	31.0721
Europe	30.031	29.1305	16.7781	36.4963	23.6424	30.1482
Middle East	17.405	18.9645	9.05917	14.1061	16.0068	18.7796
Y Chromosome
	Algiers	Oran	Zenata	Reguibate	Mozabite2	Oran3	Algiers4	Tizi Ouzou4
Sub-saharan Africa	3.84	12.5	25.72	3.33	10	7.84	2.86	0
North Africa	69.23	48.75	50	83.3367	80	48.04	58.0983	61.41
Europe	7.69	11.875	11.43	1.66667	10	16.18	6.66833	19.3
Middle East	19.23	26.875	12.86	11.6667	0	27.94	32.3833	19.3
1 HGDP project
2 Bekada et al. 2013
3 Shi et al. 2010
4 Robino et al. 2008
5 Arredi et al. 2004
